# Supplementary material for: High-performance perovskite solar cells fabricated by vapor deposition with optimized PbI2 precursor films
Source: Royal Society of Chemistry journal article supplement (doi:10.1039/c5ra19343e), 2015-01-01
Supplement: c5ra19343e1.pdf [file c5ra19343e1.pdf]

## **Supplementary materials**

# **High Performance Perovskite Solar Cells by a Vapor Based Method with Optimized PbI<sub>2</sub> Precursor Films**

Yanke Peng<sup>1\*</sup>, Gaoshan Jing<sup>1\*</sup>, Tianhong Cui<sup>1, 2\*</sup>

<sup>1</sup>State Key Laboratory of Precision Measurement Technology and Instruments,

Department of Precision Instruments, Tsinghua University, Beijing, 100084, China

<sup>2</sup>Department of Mechanical Engineering, University of Minnesota, Minneapolis,

Minnesota 55455, USA

## Testing platform for solar cell long term stability measurement

A PMMA sealed box is used to maintain the humidity at a constant value when the solar cell is heated. The heater module (TC-48-20, TE technology, INC., Traverse city, USA) was used to main the heating temperature at a constant value. Temperature control accuracy of this testing platform is  $\pm 1^{\circ}\text{C}$ . Humidity control accuracy of this testing platform is  $\pm 3\%$  (relative humidity).

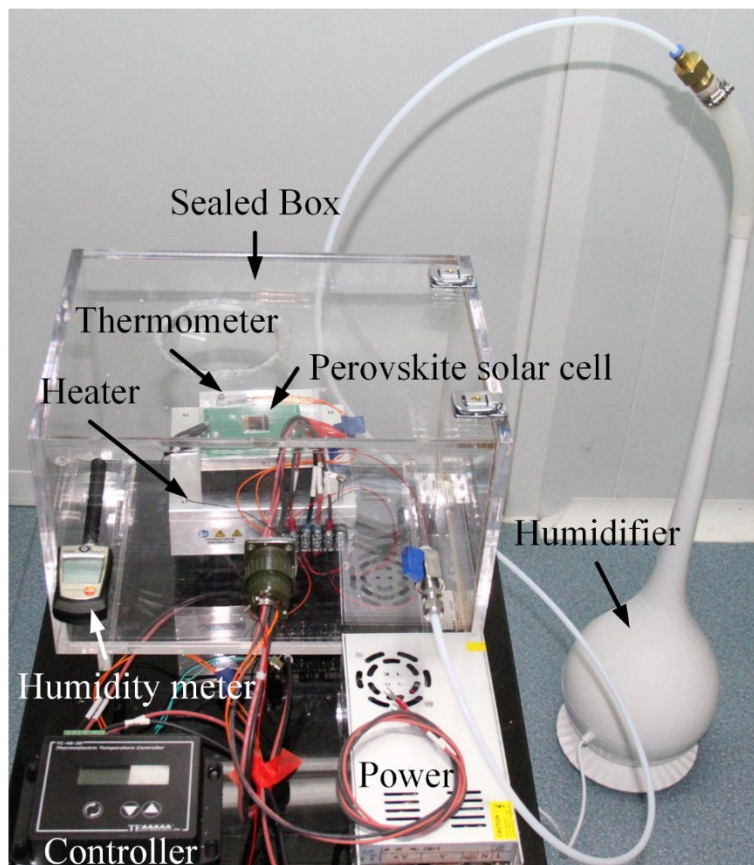

Figure S1. Testing platform for perovskite solar cell long term stability measurement

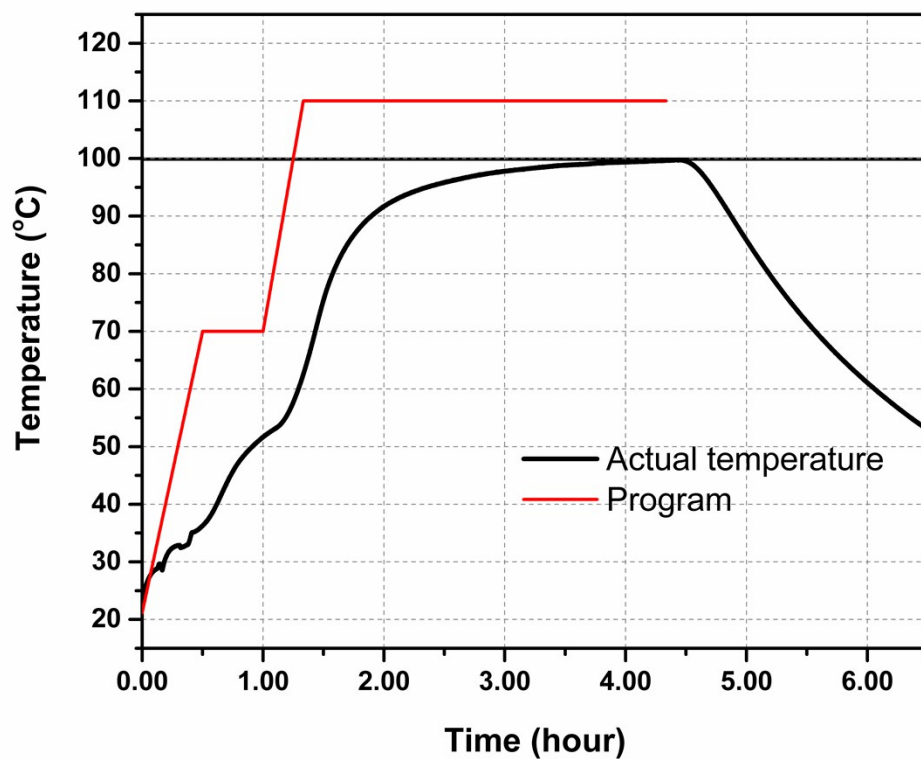

Figure S2. Actual temperature curve in the quartz recorded by a wireless thermometer when the furnace heating up program was set as: 30 min to heat up from the room temperature to 70 °C, maintaining for 30 min, taking 20 min to heat up to 110 °C, maintaining for three hours, then end the program. Finally, the quartz tube cooled down to the room temperature.

Table S1. Statistics of ten HPCVD solar cells before and after heat-treated at 80 °C for 50 h and 96 h.

| No.                            | $J_{SC}$ (mA cm <sup>-2</sup> ) | $V_{OC}$ (V) | FF          | PCE (%)    |
|--------------------------------|---------------------------------|--------------|-------------|------------|
| Before treatment               |                                 |              |             |            |
| <b>Avg.</b>                    | <b>16.55</b>                    | <b>0.96</b>  | <b>0.54</b> | <b>8.9</b> |
| 1                              | 18.80                           | 0.97         | 0.63        | 11.8       |
| 2                              | 16.60                           | 0.95         | 0.50        | 8.1        |
| 3                              | 15.70                           | 0.95         | 0.51        | 7.8        |
| 4                              | 16.70                           | 0.97         | 0.47        | 7.8        |
| 5                              | 17.10                           | 0.98         | 0.49        | 8.5        |
| 6                              | 17.60                           | 0.96         | 0.58        | 10.1       |
| 7                              | 16.30                           | 1.01         | 0.59        | 10.0       |
| 8                              | 19.00                           | 0.89         | 0.56        | 9.8        |
| 9                              | 12.30                           | 0.98         | 0.54        | 6.7        |
| 10                             | 15.40                           | 0.91         | 0.54        | 7.8        |
| After heated at 80 °C for 50 h |                                 |              |             |            |
| <b>Avg.</b>                    | <b>16.06</b>                    | <b>0.94</b>  | <b>0.51</b> | <b>7.9</b> |
| 1                              | 18.90                           | 0.95         | 0.52        | 9.6        |
| 2                              | 16.60                           | 0.95         | 0.50        | 8.1        |
| 3                              | 14.40                           | 0.92         | 0.33        | 4.5        |
| 4                              | 16.00                           | 0.96         | 0.47        | 7.4        |
| 5                              | 15.50                           | 0.95         | 0.53        | 8.0        |
| 6                              | 17.60                           | 0.96         | 0.57        | 9.9        |
| 7                              | 16.30                           | 0.97         | 0.60        | 9.8        |
| 8                              | 19.30                           | 0.89         | 0.51        | 9.0        |
| 9                              | 10.60                           | 0.90         | 0.49        | 4.8        |
| 10                             | 15.40                           | 0.91         | 0.54        | 7.8        |
| After heated at 80 °C for 96 h |                                 |              |             |            |
| <b>Avg.</b>                    | <b>14.53</b>                    | <b>0.92</b>  | <b>0.48</b> | <b>6.9</b> |
| 1                              | 14.00                           | 0.90         | 0.49        | 6.4        |
| 2                              | 15.20                           | 0.91         | 0.45        | 6.4        |
| 3                              | 10.90                           | 0.88         | 0.31        | 3.1        |
| 4                              | 15.60                           | 0.98         | 0.47        | 7.4        |
| 5                              | 14.10                           | 0.96         | 0.49        | 6.8        |
| 6                              | 17.10                           | 0.97         | 0.58        | 9.9        |
| 7                              | 16.10                           | 1.00         | 0.61        | 10.1       |
| 8                              | 17.20                           | 0.82         | 0.53        | 7.7        |
| 9                              | 11.70                           | 0.92         | 0.44        | 4.9        |
| 10                             | 13.40                           | 0.89         | 0.47        | 5.8        |
